# Supplementary material for: Gram Stain and Culture of Sputum Samples Detect Only Few Pathogens in Community-Acquired Lower Respiratory Tract Infections: Secondary Analysis of a Randomized Controlled Trial
Source: MDPI journal article supplement (doi:10.3390/diagnostics13040628), 2023-02-08
Supplement: s1 [file s1]

## Supplementary material

### Gram stain and culture of sputum samples are of limited diagnostic value: Secondary analysis of a randomized controlled trial

Mariana B. Cartuliales, Helene Skjøt-Arkil, Christian B. Mogensen, Thor A. Skovsted, Steen L. Andersen, Andreas K. Pedersen, and Flemming S. Rosenvinge

Supplementary Table S1: Sensitivity analysis of Gram stain and culture from samples obtained by TS (TS-SG, TS-IG) and FET.

| Findings                         | Sampling method |          | Total                  | p-value |
|----------------------------------|-----------------|----------|------------------------|---------|
|                                  | TS              | FET      |                        |         |
| Total (%)                        | 177 (78%)       | 50 (22%) | 227                    |         |
| <b>Gram stain</b>                |                 |          |                        |         |
| Number of positive samples       | 31 (18%)        | 15 (30%) | 46 (20%)*              |         |
| All potential pathogens          | 39 (22%)        | 22 (44%) | 61 (27%)*              | 0.851   |
| Gram-positive cocci chains/pairs | 15 (38%)        | 6 (27%)  | 21 (34%) <sup>#</sup>  |         |
| Gram-positive cocci clusters     | 3 ( 8%)         | 2 ( 9%)  | 5 (8%) <sup>#</sup>    |         |
| Gram-negative rods               | 5 ( 13%)        | 6 (27%)  | 11 (18%) <sup>#</sup>  |         |
| Gram-positive rods               | 2 ( 5%)         | 1 ( 5%)  | 3 (5%) <sup>#</sup>    |         |
| Gram-positive single             | 5 ( 13%)        | 3 ( 14%) | 8 (13%) <sup>#</sup>   |         |
| Gram-negative diplococci         | 3 ( 8%)         | 2 ( 9%)  | 5 (8%) <sup>#</sup>    |         |
| Yeast                            | 6 ( 15%)        | 2 ( 9%)  | 8 ( 13%) <sup>#</sup>  |         |
| Upper airway microbiota          | 57 (32%)        | 28 (56%) | 85 (37%)*              | 0.009   |
| <b>Culture</b>                   |                 |          |                        |         |
| Number of positive samples       | 63 (36%)        | 18 (36%) | 81 (36%)*              |         |
| All potential pathogens          | 72 (41%)        | 21 (42%) | 93 (41%)*              | 0.682   |
| <i>Streptococcus pneumoniae</i>  | 4 ( 6%)         | 1 ( 5%)  | 5 ( 5%) <sup>#</sup>   |         |
| <i>Enterococcus</i> sp.          | 2 ( 3%)         | 0 ( 0%)  | 2 ( 2%) <sup>#</sup>   |         |
| <i>Staphylococcus aureus</i>     | 19 (26%)        | 2 (10%)  | 21 ( 23%) <sup>#</sup> |         |
| <i>Haemophilus influenzae</i>    | 3 (4%)          | 2 (10%)  | 5 (5%) <sup>#</sup>    |         |
| <i>Enterobacterales</i>          | 25 (35%)        | 10 (48%) | 35 (38%) <sup>#</sup>  |         |
| <i>Moraxella catarrhalis</i>     | 3 (4%)          | 2 (10%)  | 5 (5%) <sup>#</sup>    |         |
| <i>Pseudomonas aeruginosa</i>    | 1 (1%)          | 0 (0%)   | 1 (1%) <sup>#</sup>    |         |
| Other                            | 1 (1%)          | 0 (0%)   | 1 (1%) <sup>#</sup>    |         |
| Yeast                            | 14 (19%)        | 4 (19%)  | 18 (19%) <sup>#</sup>  |         |
| Upper airway microbiota          | 27 (15%)        | 7 (14%)  | 34 (15%)*              | 0.836   |
| No growth of pathogens           | 67 (38%)        | 16 (32%) | 83 (37%)*              | 0.519   |

\*Percentage of total <sup>#</sup>Percentage of all potential pathogens. TS (TS-SG and TS-IG) Tracheal secretion from the standard care group and Tracheal secretion from the intervention group FET: Forced expiratory technique

Supplementary Table S2: Sensitivity analysis of Gram stain and culture from samples obtained by TS (TS-SG, TS-IG) and IS.

| Findings                         | Sampling method |          | Total                  | p-value |
|----------------------------------|-----------------|----------|------------------------|---------|
|                                  | TS              | IS       |                        |         |
| Total (%)                        | 177 (75%)       | 58 (25%) | 235                    |         |
| <b>Gram stain</b>                |                 |          |                        |         |
| Number of positive samples       | 31 (18%)        | 13 (22%) | 44 (19%)*              |         |
| All potential pathogens          | 39 (22%)        | 14 (24%) | 53 (23%)*              | 0.210   |
| Gram-positive cocci chains/pairs | 15 (38%)        | 4 (29%)  | 19 (36%) <sup>#</sup>  |         |
| Gram-positive cocci clusters     | 3 ( 8%)         | 1 ( 7%)  | 4 ( 8%) <sup>#</sup>   |         |
| Gram-negative rods               | 5 ( 13%)        | 6 (43%)  | 11 ( 21%) <sup>#</sup> |         |
| Gram-positive rods               | 2 ( 5%)         | 0 ( 0%)  | 2 ( 4%) <sup>#</sup>   |         |
| Gram-positive single             | 5 ( 13%)        | 1 ( 7%)  | 6 ( 11%) <sup>#</sup>  |         |
| Gram-negative diplococci         | 3 ( 8%)         | 2 ( 14%) | 5 (9%) <sup>#</sup>    |         |
| Yeast                            | 6 ( 15%)        | 0 ( 0%)  | 6 ( 11%) <sup>#</sup>  |         |
| Upper airway microbiota          | 57 (32%)        | 32 (55%) | 89 (38%)*              | 0.008   |
| <b>Culture</b>                   |                 |          |                        |         |
| Number of positive samples       | 63 (36%)        | 24 (41%) | 87 (37%)*              |         |
| All potential pathogens          | 72 (41%)        | 27 (47%) | 99 (42%)*              | 0.391   |
| <i>Streptococcus pneumoniae</i>  | 4 ( 6%)         | 1 ( 4%)  | 5 ( 5%) <sup>#</sup>   |         |
| <i>Enterococcus</i> sp.          | 2 ( 3%)         | 0 ( 0%)  | 2 ( 2%) <sup>#</sup>   |         |
| <i>Staphylococcus aureus</i>     | 19 (26%)        | 2 (7%)   | 21 (21%) <sup>#</sup>  |         |
| <i>Haemophilus influenzae</i>    | 3 (4%)          | 2 (7%)   | 5 (5%) <sup>#</sup>    |         |
| <i>Enterobacteriales</i>         | 25 (35%)        | 10 (37%) | 35 (35%) <sup>#</sup>  |         |
| <i>Moraxella catarrhalis</i>     | 3 (4%)          | 1 (4%)   | 4 (4%) <sup>#</sup>    |         |
| <i>Pseudomonas aeruginosa</i>    | 1 (1%)          | 1 (4%)   | 2 (2%) <sup>#</sup>    |         |
| Other                            | 1 (1%)          | 2 (7%)   | 3 (3%) <sup>#</sup>    |         |
| Yeast                            | 14 (19%)        | 8 (30%)  | 22 (22%) <sup>#</sup>  |         |
| Upper airway microbiota          | 27 (15%)        | 8 (14%)  | 35 (15%)*              | 0.797   |
| No growth of pathogens           | 67 (38%)        | 15 (26%) | 82 (35%)*              | 0.154   |

\*Percentage of total <sup>#</sup>Percentage of all potential pathogens. TS (TS-SG and TS-IG) Tracheal secretion from the standard care group and Tracheal secretion from the intervention group. IS: Induced sputum

Supplementary Table S3: Sensitivity analysis of the detected pathogens in relation to antibiotic treatment (within one month before admission) stratified by the collected methods TS and FET, and TS and IS.

| Detected pathogens from<br>TS-SG, TS-IG, and IS  | Antibiotics (NO)<br>n=103 (44%) | Antibiotic (YES)<br>n=132 (56%) | Total<br>n=235 | p-value |
|--------------------------------------------------|---------------------------------|---------------------------------|----------------|---------|
| Common pathogens of CA-LRTI                      | 9 (9%)                          | 5 (4%)                          | 14 (6%)*       | 0.025   |
| Possible pathogens of CA-LRTI                    | 13 (13%)                        | 10 (8%)                         | 23 (10%)*      | 0.030   |
| Unlikely pathogens of CA-LRTI                    | 15 (15%)                        | 47 (36%)                        | 62 (26%)*      | <0.001  |
| Detected pathogens from<br>TS-SG, TS-IG, and FET | Antibiotics (NO)<br>n=102 (45%) | Antibiotic (YES)<br>n=125 (55%) | Total<br>n=227 | p-value |
| Common pathogens of CA-LRTI                      | 10 (10%)                        | 5 (4%)                          | 1 (<1%)*       | 0.015   |
| Possible pathogens of CA-LRTI                    | 13 (13%)                        | 9 (7%)                          | 22 (10%)*      | 0.025   |
| Unlikely pathogens of CA-LRTI                    | 13 (13%)                        | 43 (34%)                        | 56 (25%)*      | <0.001  |

\*Percentage of total. TS-SG: Tracheal secretion from the standard care group, TS-IG: Tracheal secretion from the intervention group, FET: Forced expiratory technique, IS: Induced sputum.

Supplementary Table S4: Identified microorganisms and upper airway microbiota in samples from patients untreated and treated with antibiotics (within one month before admission).

|                            | Antibiotic (NO)<br>n=128 (45%) | Antibiotic (YES)<br>n=157 (55%) | Total<br>n=285        | p-value |
|----------------------------|--------------------------------|---------------------------------|-----------------------|---------|
| <b>Culture</b>             |                                |                                 |                       |         |
| Number of positive samples | 40 (31%)                       | 65 (41%)                        | 105 (37%)*            |         |
| All potential pathogens    | 43 (34%)                       | 77 (49%)                        | 120 (42%)*            | 0.004   |
| <i>S.pneumoniae</i>        | 5 (11%)                        | 1 (1%)                          | 6 (5%) <sup>#</sup>   |         |
| <i>Enterococcus</i> sp.    | 0 (0%)                         | 2 (3%)                          | 2 (2%) <sup>#</sup>   |         |
| <i>S.aureus</i>            | 13 (30%)                       | 10 (13%)                        | 23 (19%) <sup>#</sup> |         |
| <i>H.influenzae</i>        | 3 (7%)                         | 4 (5%)                          | 7 (6%) <sup>#</sup>   |         |
| <i>Enterobacteriaceae</i>  | 11 (26%)                       | 34 (44%)                        | 45 (37%) <sup>#</sup> |         |
| <i>M.catarrhalis</i>       | 4 (9%)                         | 2 (3%)                          | 6 (5%) <sup>#</sup>   |         |
| <i>P.aeruginosa</i>        | 1 (2%)                         | 1 (1%)                          | 2 (2%) <sup>#</sup>   |         |
| Yeast                      | 4 (9%)                         | 22 (29%)                        | 26 (22%) <sup>#</sup> |         |
| Other                      | 2 (5%)                         | 1 (1%)                          | 3 (3%) <sup>#</sup>   |         |
| Upper airway microbiota    | 18 (14%)                       | 24 (15%)                        | 42 (15%)*             | 0.784   |
| No pathogen growth         | 49 (38%)                       | 49 (31%)                        | 98 (34%)*             | 0.282   |

\*Percentage of total <sup>#</sup>Percentage of all potential pathogens.
